# Supplementary material
Source: Springer Nature journal article supplement (https://www.springermedizin.de/resource/supplementary/12981_2009_123_MOESM1_ESM.pdf/9603872)

**A**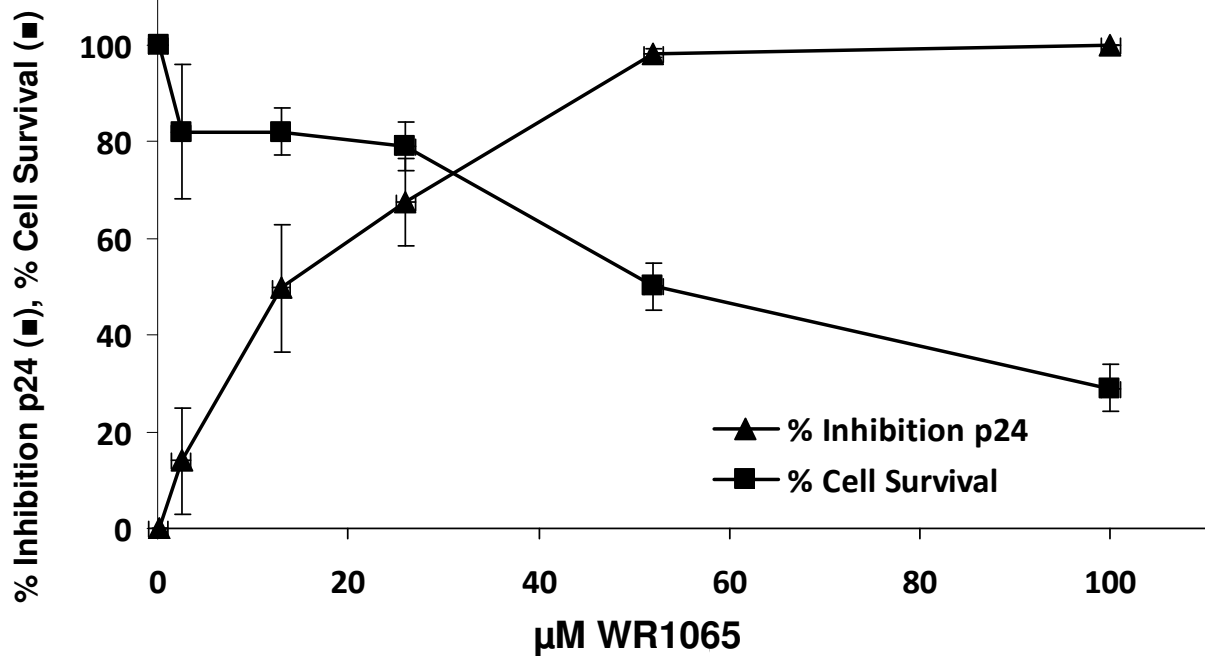**B**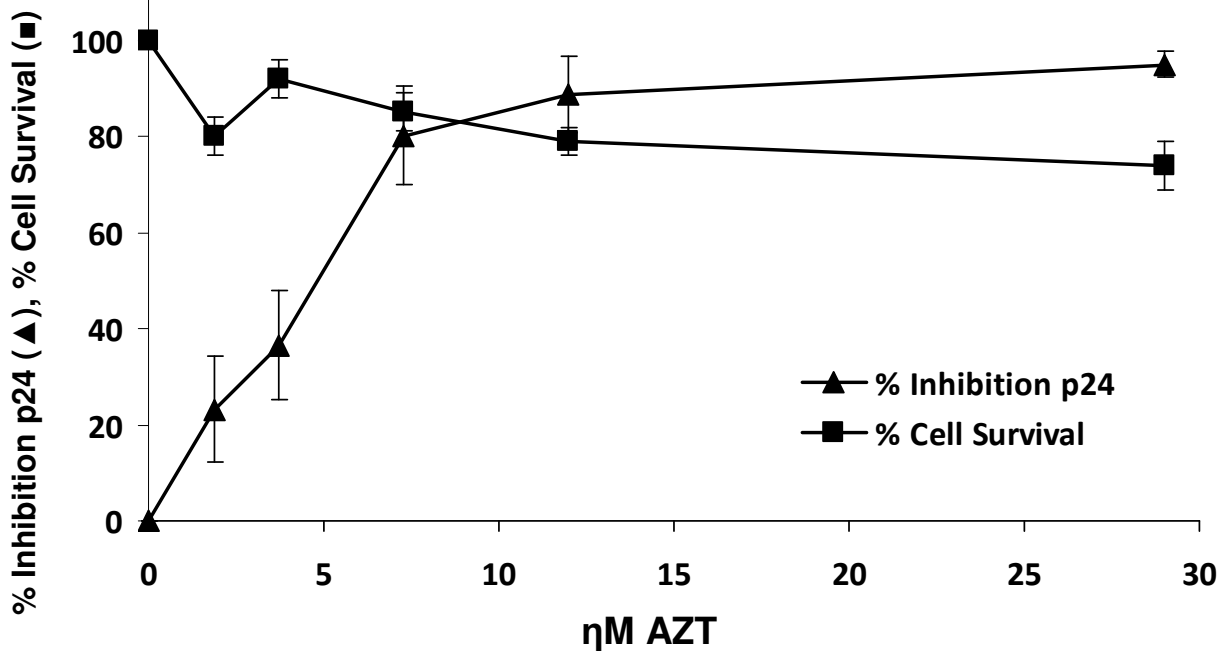

Supplement: MOESM1 [file 9603872]
